# Supplementary material
Source: publisher figshare collection journal article supplement (https://rs.figshare.com/ndownloader/files/24316242)
Supplement: Supplementary file 1 [file 24316242]

## Sheet: Metadata
	Dataset S5. Estimated rates of body-size evolution in well-sampled families
	Estimated rates of evolution for tadpole body size, adult body size, and TA ratio (ratio of tadpole to adult body size)
	Rates are estimated separately in each family based on the maximum likelihood estimate of sigma squared
	Correlated and decoupled evolution of adult and larval body size in frogs
	Tung X. Phung, João C. S. Nascimento, Alexander J. Novarro, John J. Wiens
	Proceedings of the Royal Society of London B, Biological Sciences
	10.1098/rspb

## Sheet: Dataset S5
	Family	Tadpole rate	Adult rate	TA ratio rate
1	Alsodidae	0.00542681	9.86e-05	0.000374425
2	Bufonidae	0.00907167	0.00727422	0.000451499
3	Centrolenidae	0.0123586	0.000364874	0.00110044
4	Dendrobatidae	0.00244155	0.000946744	0.000321432
5	Dicroglossidae	0.0022	0.0051	0.000218
6	Hylidae	0.00523051	0.00325811	0.000415138
7	Hyperoliidae	0.00490674	0.00254602	0.000411677
8	Leptodactylidae	0.00704458	0.00453909	0.000381543
9	Mantellidae	0.00176622	0.0014522	0.000130607
10	Megophryidae	0.00244269	0.0015443	0.000170001
11	Microhylidae	0.00221076	0.00250331	0.000211415
12	Myobatrachidae	0.00794832	0.00701017	0.00112787
13	Odontophrynidae	0.00871679	0.00366078	0.000770783
14	Pyxicephalidae	0.00151284	0.00612575	0.000355485
15	Ranidae	0.00439864	0.00249122	0.000206425
16	Rhacophoridae	0.00213297	0.00316826	7.8274e-05
17	Scaphiopodidae	0.002311	0.000819209	0.000209721
18	Telmatobiidae	0.00295865	0.0045701	0.000301811
